# Supplementary material for: Multiple renal cancer susceptibility polymorphisms modulate the HIF pathway
Source: PubMed Central journal article supplement (PMC5536434; doi:10.1371/journal.pgen.1006872), 2017-07-17
Supplement: pgen.1006872.s003.pdf [file pgen.1006872.s003.pdf]

**A**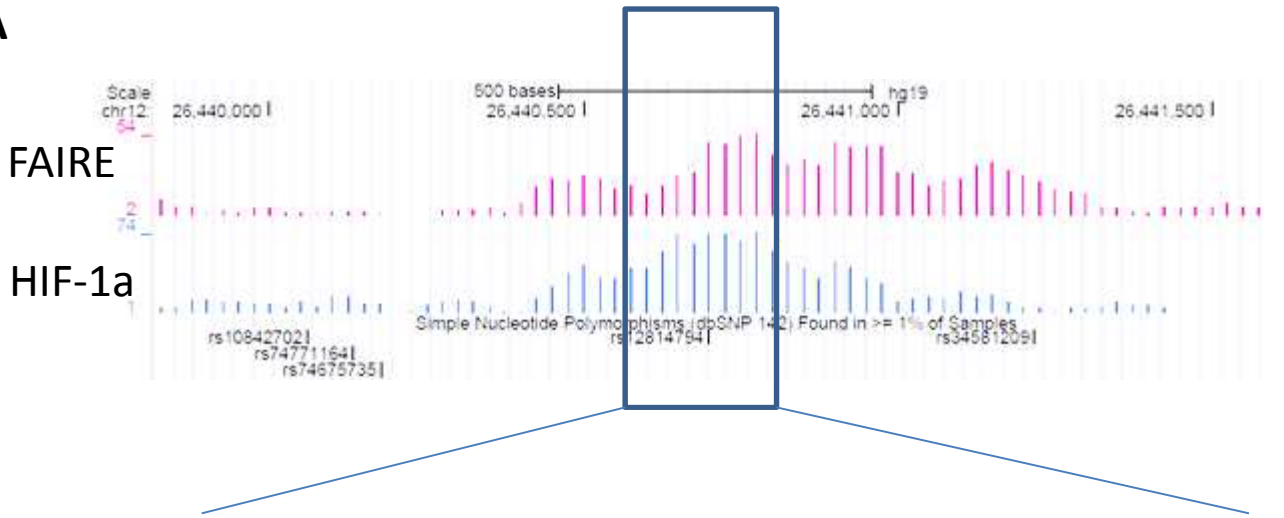

CCCTTCTGATTCAGCTGACCACTGTGCACTGTAGCGACCTGCAAGGGGTAGGAGTGGACACATTCCAGCTCGCTG

rs12814794

A>G

**B**

### Sequence of the HIF-binding enhancer

TTGGAACCACAGCTCCTCCATGGCCAAATTTCTCTTTATGTCTCAGGTTT  
 CAGAGCATGGCCTAATAATTTCCCGTACAGACAGGCCGCTCCGCTGCCCTT  
 CTGATTCAGCTGACCACTGTGCACTGTAGCGACCTGCAAGGGGTAGGAGT  
 GGACACATTCCAGCTCGCTGGGGTTTGGAACGGCACCTCTCATTCCAGA  
 GAAGGGATTCTCTGTGGAGGCTGAGTTGGCAGTGTCAAGCTTGCCTTGC  
 GTTGGCACGTAGGCCATCAGCAATCATCTGAGTATCAACCTGCCAAGCT  
 GAGGCCGTCCTGGGGCACAGAGATTTATTGCTAACAGAGGAAAGAAAAGA
