# Supplementary material for: Multiple renal cancer susceptibility polymorphisms modulate the HIF pathway
Source: PubMed Central journal article supplement (PMC5536434; doi:10.1371/journal.pgen.1006872), 2017-07-17

*EGLN3* expression

rs12814794 genotype

AA

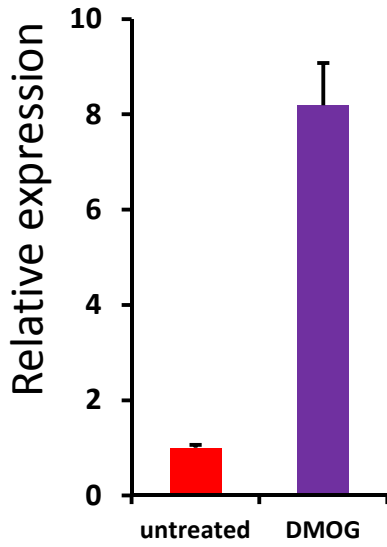

GG

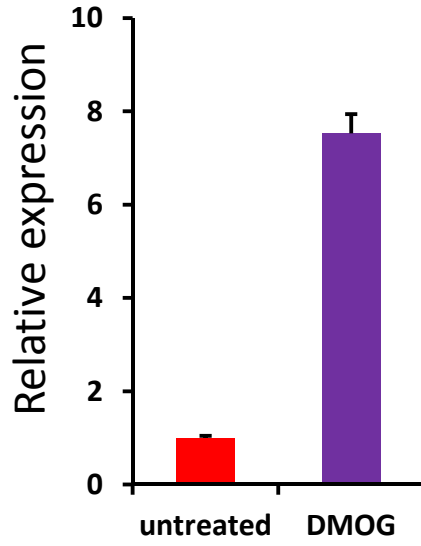

AG

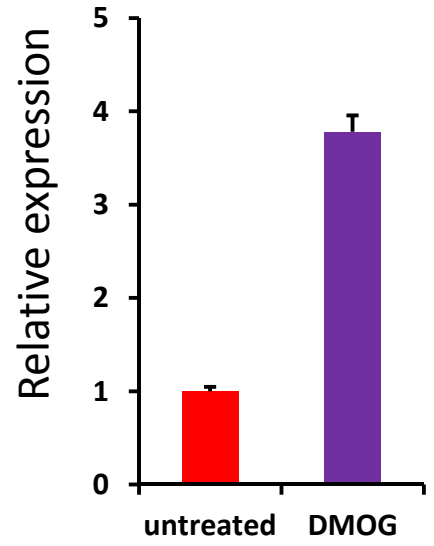

Supplement: pgen.1006872.s004.pdf [file pgen.1006872.s004.pdf]
