# Supplementary material for: Multiple renal cancer susceptibility polymorphisms modulate the HIF pathway
Source: PubMed Central journal article supplement (PMC5536434; doi:10.1371/journal.pgen.1006872), 2017-07-17

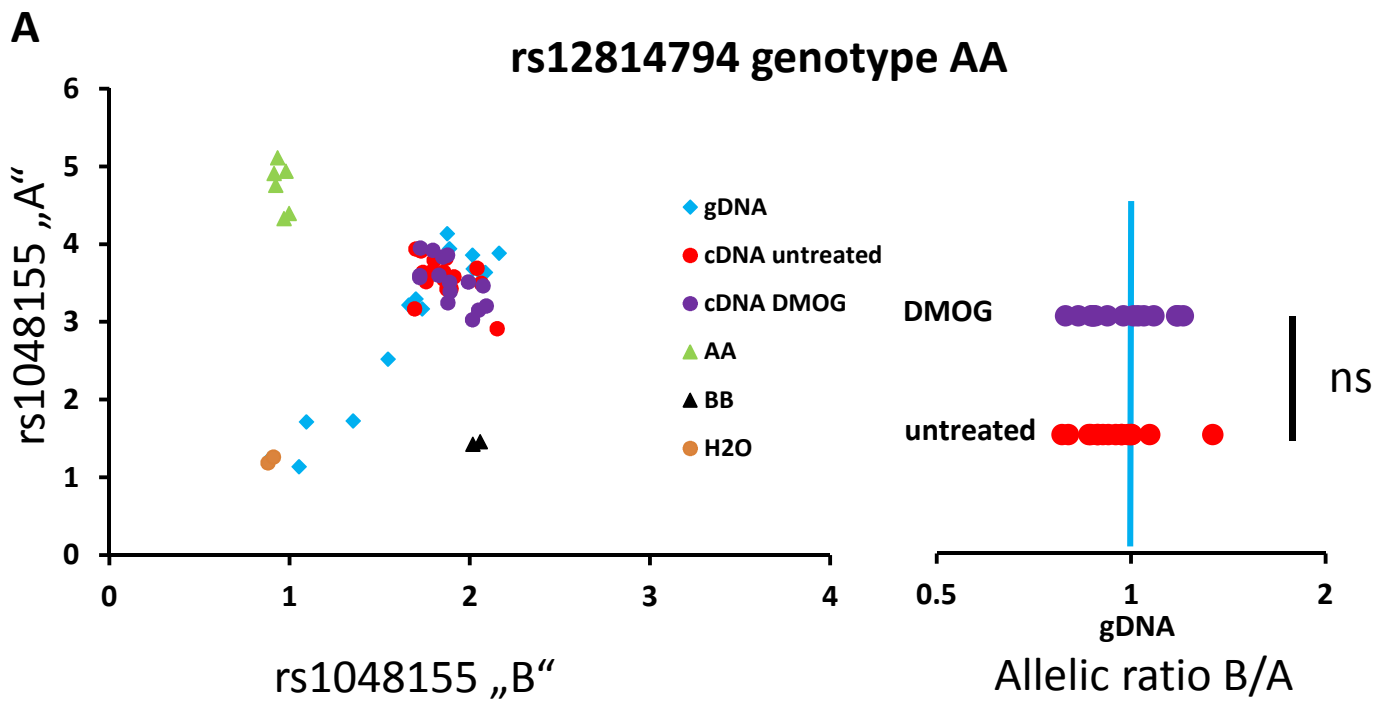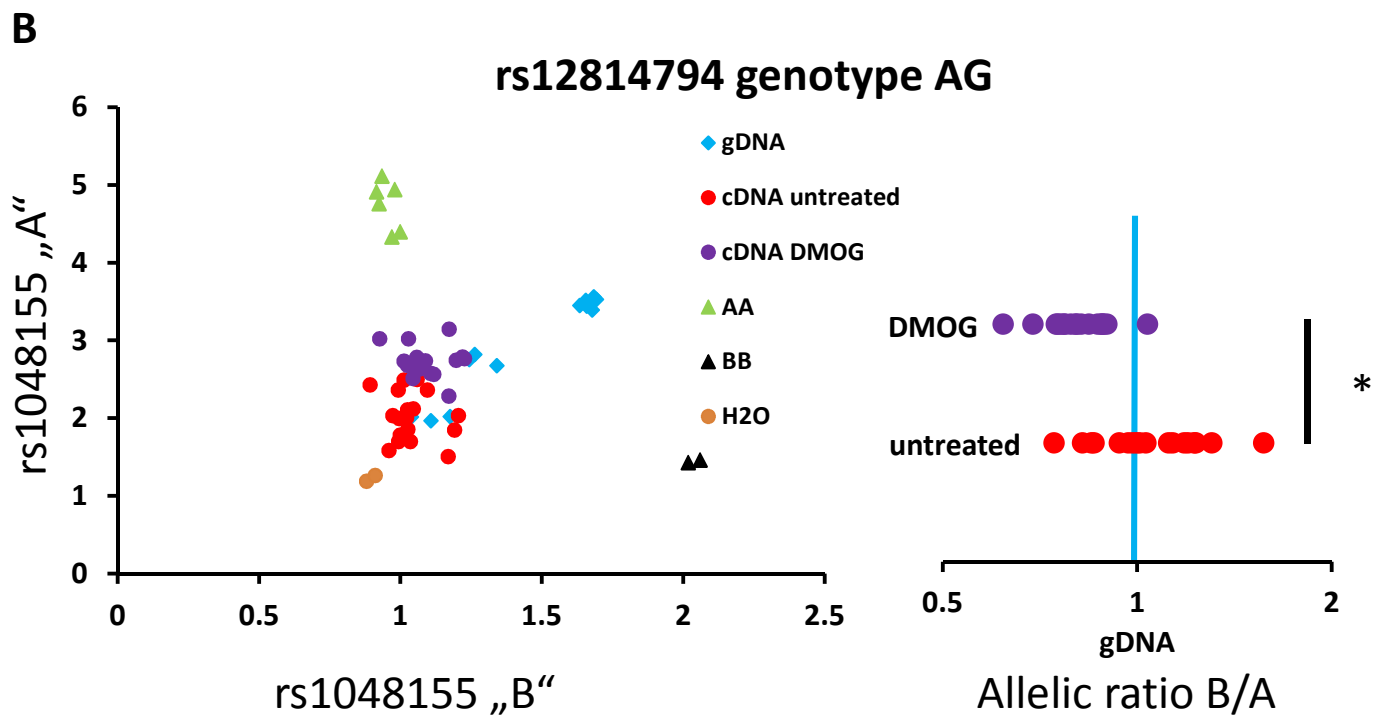

Supplement: pgen.1006872.s005.pdf [file pgen.1006872.s005.pdf]
