# Supplementary material for: Multiple renal cancer susceptibility polymorphisms modulate the HIF pathway
Source: PubMed Central journal article supplement (PMC5536434; doi:10.1371/journal.pgen.1006872), 2017-07-17
Supplement: pgen.1006872.s009.pdf [file pgen.1006872.s009.pdf]

| <b>Primers and assays</b> |                      |                        |
|---------------------------|----------------------|------------------------|
| chr 12p12.1               |                      |                        |
| <b>Expression</b>         | fw                   | rev                    |
| HPRT                      | GACCAGTCAACAGGGGACAT | AACACTTCGTGGGGTCCTTTTC |
| BHLHE41                   | GCATGAAACGAGACGACACC | CGCTCCCCATTCTGTAAAGC   |
| EGLN3                     | GGCCATCAGCTTCCTCCTG  | GGTGATGCAGCGACCATCA    |
| <b>FAIRE/ChIP</b>         | fw                   | rev                    |
| chr 12p12.1               | AGGTTTCAGAGCATGGCCTA | GCTGGAATGTGTCCACTCCT   |
| Control region            | AGCAAAGCAGAATGGAAGGA | CCCCACTGTGGAGTTTGTCT   |
| <b>Taqman assays</b>      | Cat. No.             | Supplier               |
| rs12814794                | # C__31384137_10     | Life Technologies      |
| rs1048155                 | # C__1921778_10      | Life Technologies      |
